# Supplementary material for: Using Multisource High-Resolution Remote Sensing Data (2 m) with a Habitat–Tide–Semantic Segmentation Approach for Mangrove Mapping
Source: MDPI journal article supplement (doi:10.3390/rs15225271), 2023-11-07
Supplement: s1 [file s1]

# Supplementary Figures

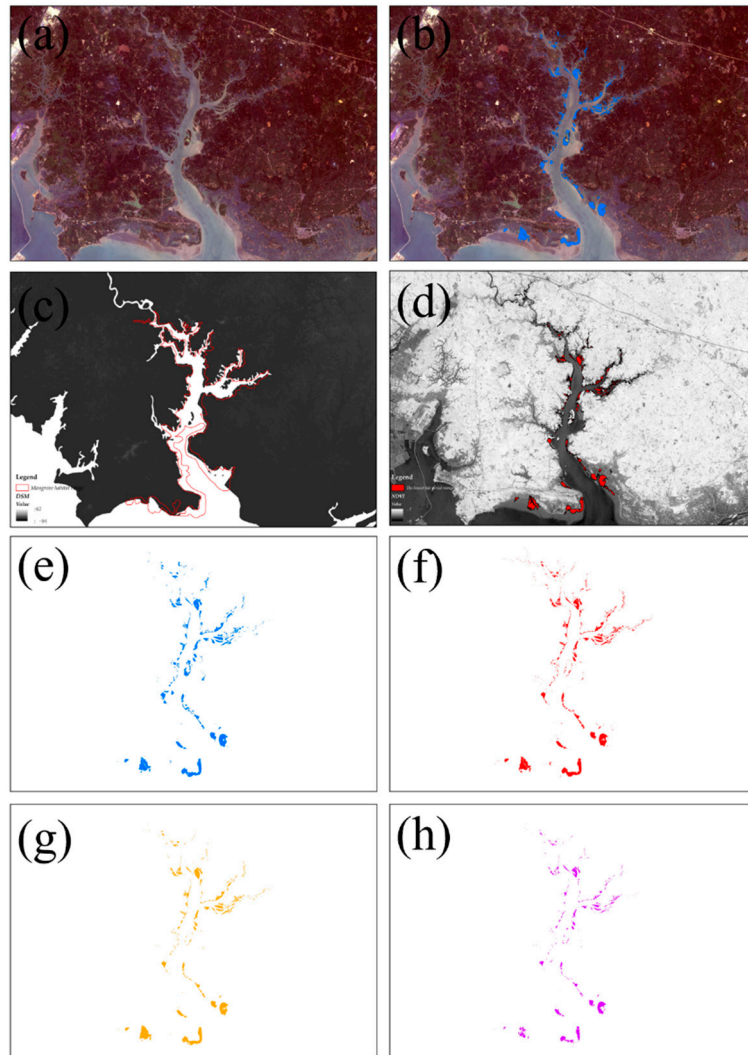

**Figure S1:** The Hybrid U-Net result of DFJ at the Beibu Gulf. (a, b) The satellite image of mangrove area in 2021, (c) Mangrove habitat information, (d) Low tide level acquisition, (e) The Hybrid U-Net result in 2020, (f) The Hybrid U-Net result in 2019, (g) The Hybrid U-Net result in 2018, (h) The Hybrid U-Net result in 2015

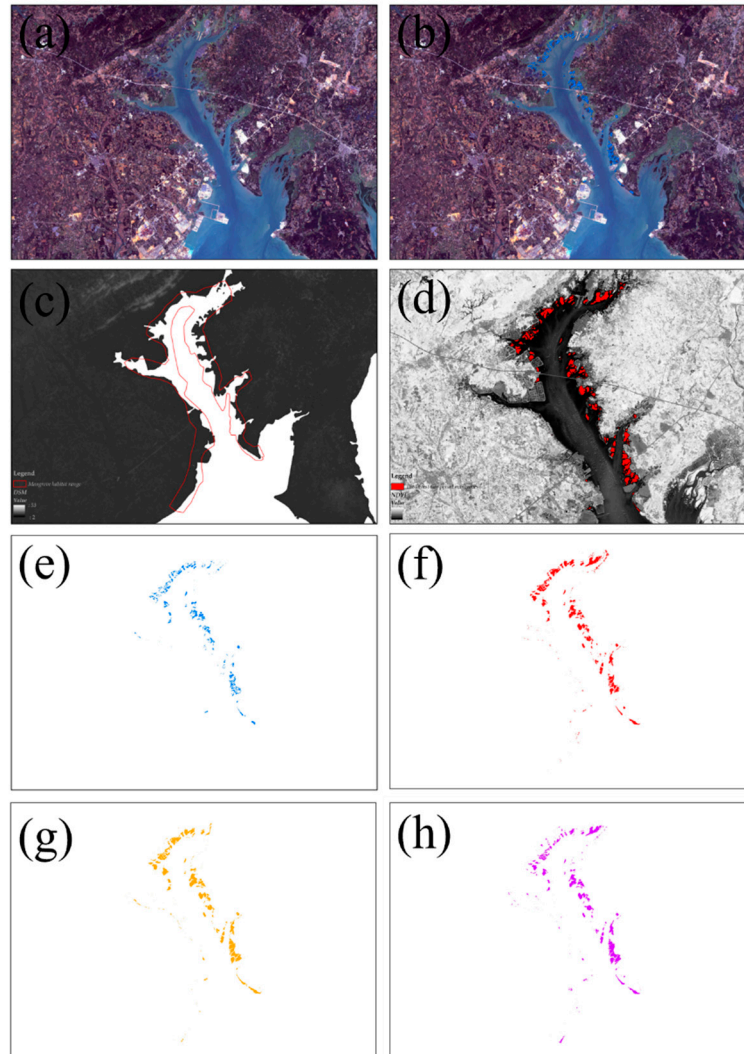

**Figure S2:** The Hybrid U-Net result of TSG at the Beibu Gulf. (a, b) The satellite image of mangrove area in 2021, (c) Mangrove habitat information, (d) Low tide level acquisition, (e) The Hybrid U-Net result in 2020, (f) The Hybrid U-Net result in 2019, (g) The Hybrid U-Net result in 2018, (h) The Hybrid U-Net result in 2015.

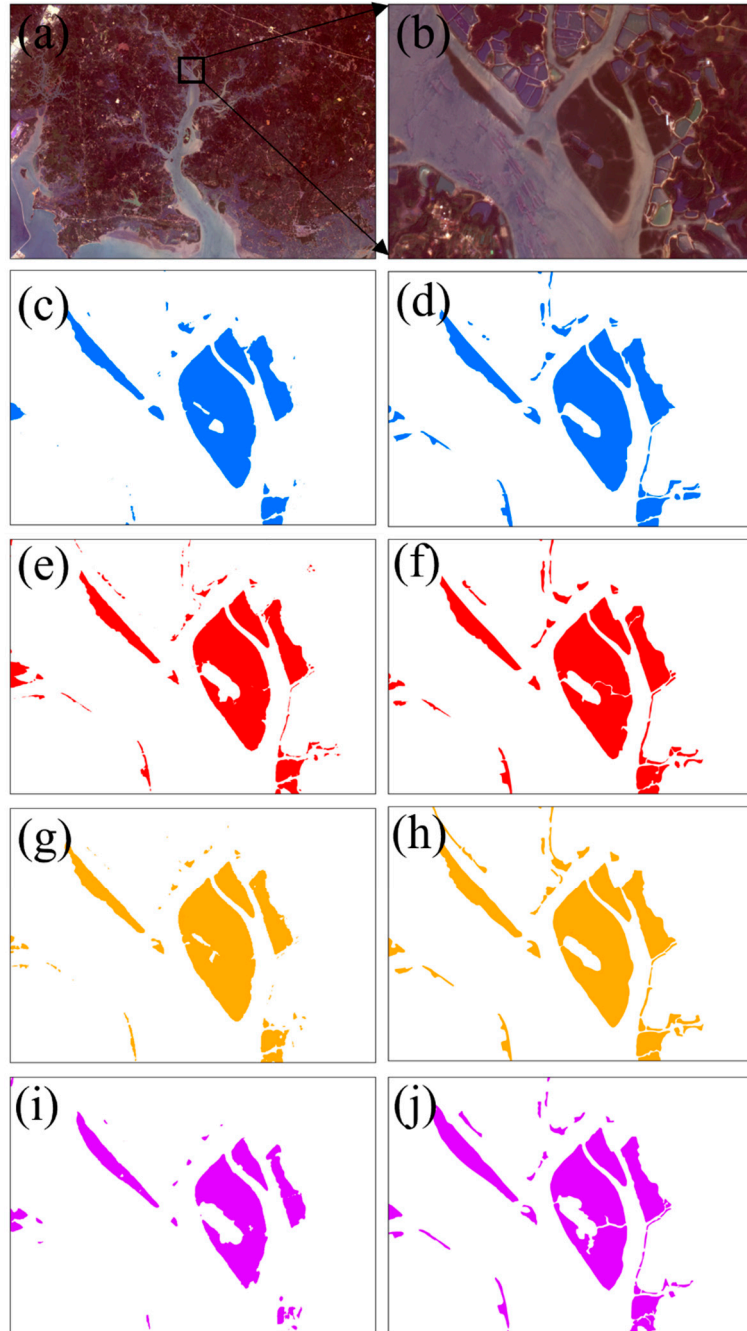

**Figure S3:** Comparison of the results of hybrid U-Net extraction of mangroves with multi-person interactive validation at DFJ: (a, b) The satellite image of mangrove area at DFJ in 2021 October, (c, e, g, i) The Hybrid U-Net result in 2020, 2019, 2018, 2015. (d, f, h, j) Multiplayer interactive validation in 2020, 2019, 2018, 2015.

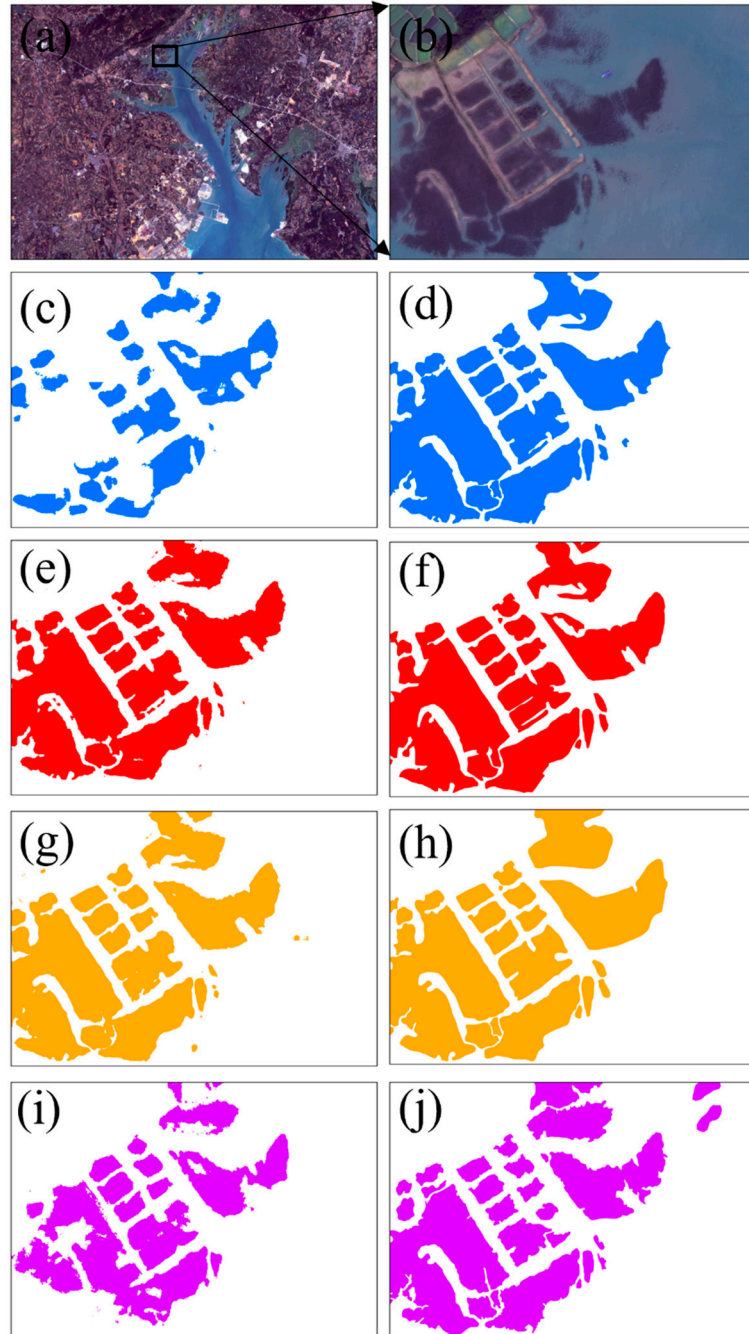

**Figure S4:** Comparison of the results of hybrid U-Net extraction of mangroves with multi-person interactive validation at TSG: (a, b) The satellite image of mangrove area at TSG in 2021 February, (c, e, g, i) The Hybrid U-Net result in 2020, 2019, 2018, 2015. (d, f, h, j) Multiplayer interactive validation in 2020, 2019, 2018, 2015.

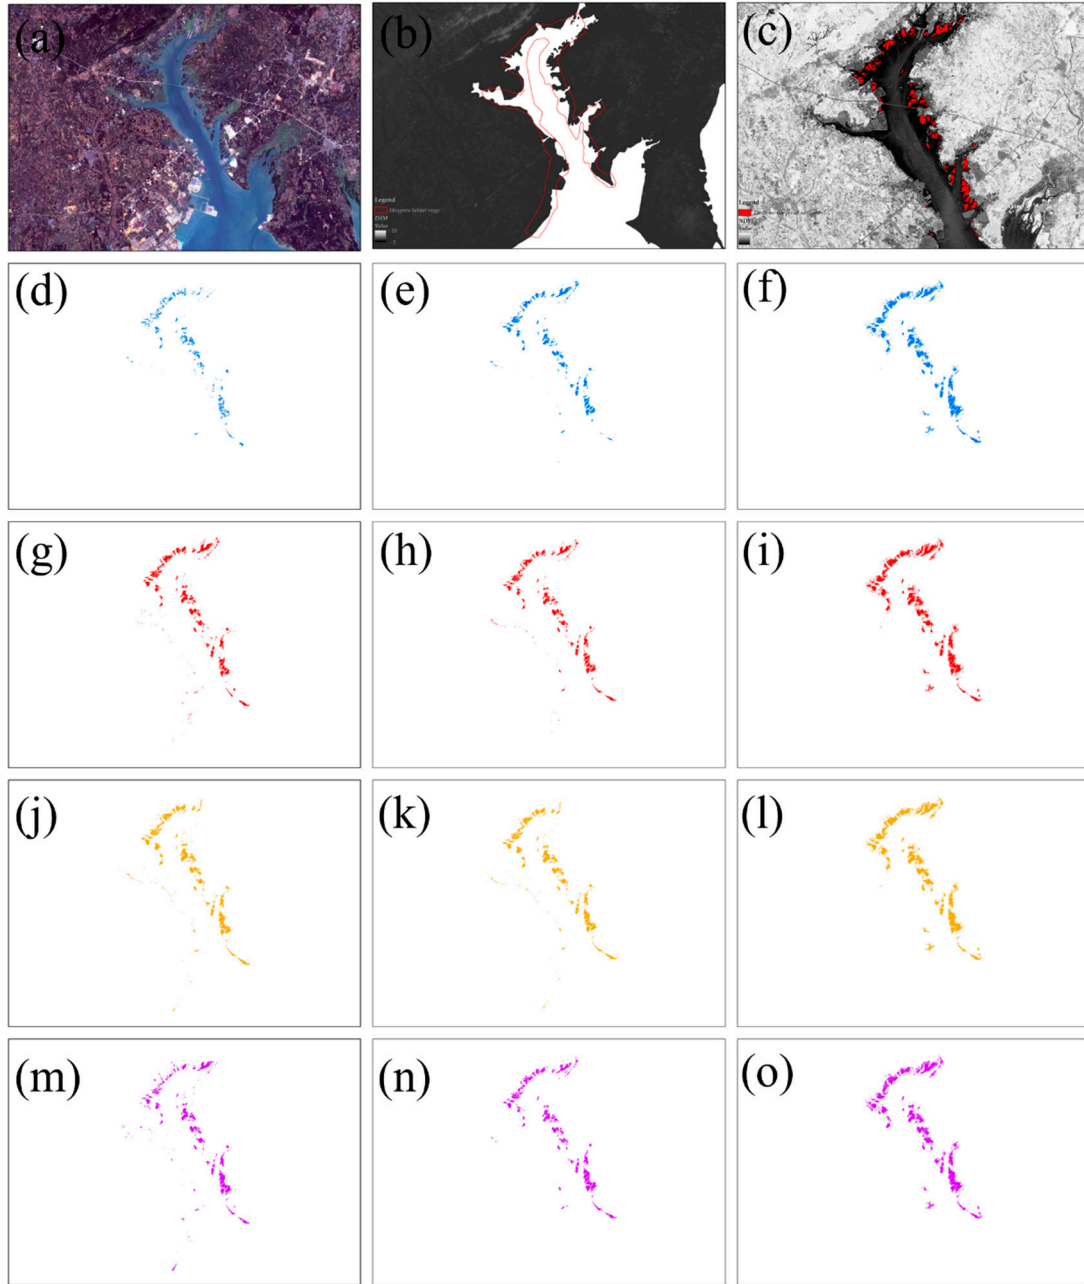

**Figure S5:** Hybrid U-Net extract mangrove results compare with existing data products. (a) The satellite image of mangrove area at DFJ, (b) Mangrove habitat information, (c) Low tide level acquisition, (d, g, j, m) The Hybrid U-Net result in 2020, 2019, 2018, 2015, (f, i, l, o) The Global Mangrove Watch (GMW) in 2020, 2019, 2018, 2015, (e) LREIS in 2020, (h) TW in 2019, (k) MCina in 2018, (n) CAS in 2015.



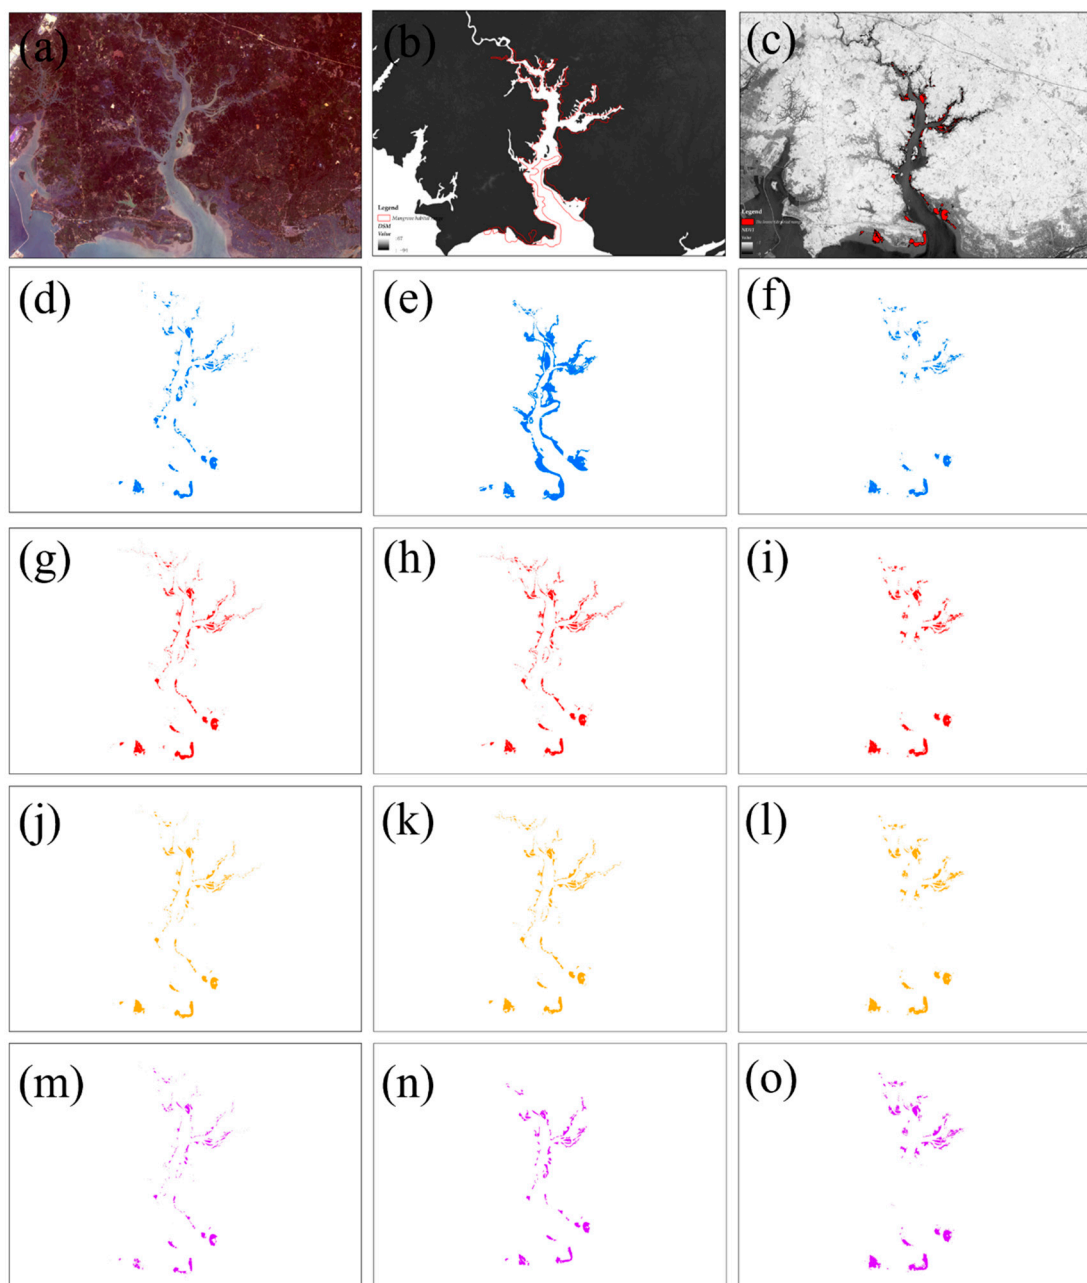

**Figure S6:** Hybrid U-Net extract mangrove results compare with existing data products. (a) The satellite image of mangrove area at TSG, (b) Mangrove habitat information, (c) Low tide level acquisition, (d, g, j, m) The Hybrid U-Net result in 2020, 2019, 2018, 2015, (f, i, l, o) The Global Mangrove Watch (GMW) in 2020, 2019, 2018, 2015, (e) LREIS in 2020, (h) TW in 2019, (k) MCina in 2018, (n) CAS in 2015.

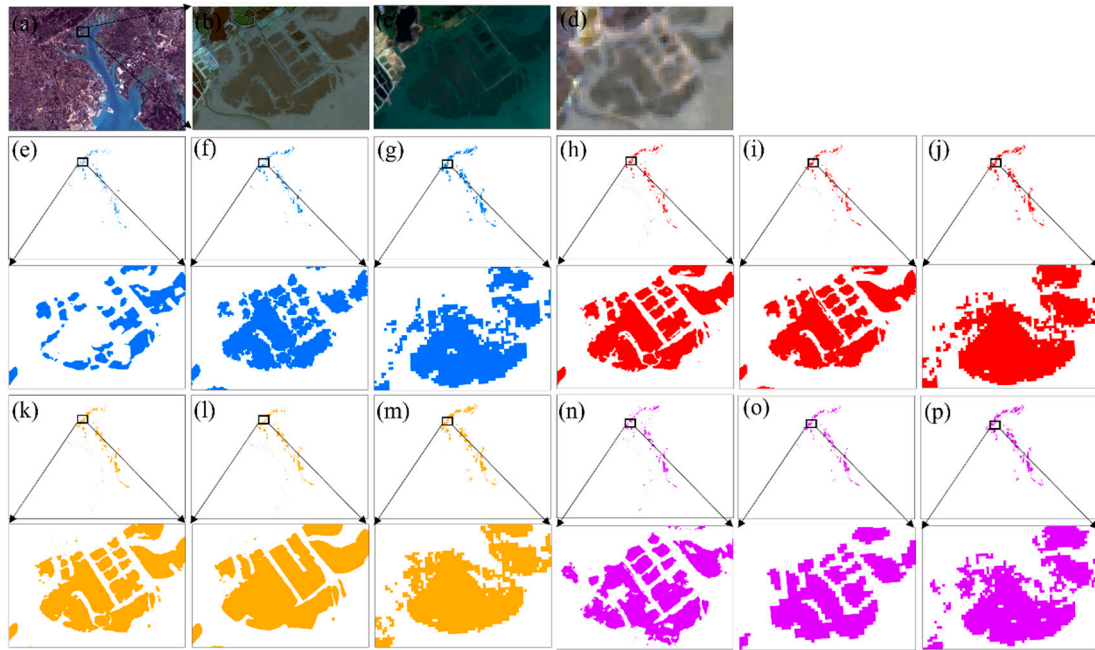

**Figure S7:** Hybrid U-Net extract mangrove results compare with existing data products. (TSG details). (a) The GF-1 satellite image(2m) of mangrove area at TSG, (b) The GF-1 satellite image(2m) of mangrove area at TSG (details), (c) The Sentinel-2 satellite image(10m) of mangrove area at TSG (details), (d) The Landsat 8 OLI satellite image(30m) of mangrove area at TSG (details), (e, h, k, n) The Hybrid U-Net result in 2020, 2019, 2018, 2015, (g, j, m, p), The Global Mangrove Watch (GMW) in 2020, 2019, 2018, 2015, (f) LREIS in 2020, (i) TW in 2019, (l) MCina in 2018, (o) CAS in 2015.

**Table S1.** Areal changes (ha) of mangrove forest with hybrid U-Net in the ZZW, DFJ, and TSG area for the 2015, 2018, 2019, 2020 with the base year sub-data products.

| Study area | Years | Hybrid U-Net(ha) | Base year sub-data products(ha) | GMW(ha) |
|------------|-------|------------------|---------------------------------|---------|
| ZZW        | 2015  | 781.76           | 834.12                          | 1009.92 |
|            | 2018  | 1024.6           | 947.45                          | 1037.19 |
|            | 2019  | 973.52           | 953.97                          | 1053.54 |
|            | 2020  | 929.55           | 959.91                          | 1091.07 |
| DFJ        | 2015  | 750.74           | 773.28                          | 823.55  |
|            | 2018  | 762.75           | 947.45                          | 840.55  |
|            | 2019  | 781.29           | 953.97                          | 786.46  |
|            | 2020  | 855.4            | 959.91                          | 704.89  |
| TSG        | 2015  | 912.19           | 1037.7                          | 1640.51 |
|            | 2018  | 1012.9           | 1174.79                         | 1706.86 |
|            | 2019  | 929.33           | 981.39                          | 1625.53 |
|            | 2020  | 911.88           | 907.96                          | 1419.5  |

Supplementary for remote sensing data

| <b>Number</b> | <b>Year</b> | <b>Satellite</b> | <b>Sensor</b> | <b>Data</b> | <b>Serial number</b>                         |
|---------------|-------------|------------------|---------------|-------------|----------------------------------------------|
| 1             | 2015        | GF1              | PMS1          | 20150115    | GF1_PMS1_E107.7_N21.3_20150115_L1A0000589551 |
| 2             | 2015        | GF1              | PMS1          | 20150628    | GF1_PMS1_E107.7_N21.3_20150628_L1A0000889029 |
| 3             | 2015        | GF1              | PMS1          | 20150115    | GF1_PMS1_E107.8_N21.6_20150115_L1A0000589550 |
| 4             | 2015        | GF1              | PMS1          | 20150628    | GF1_PMS1_E107.8_N21.9_20150628_L1A0000889025 |
| 5             | 2015        | GF1              | PMS1          | 20150808    | GF1_PMS1_E107.8_N21.9_20150808_L1A0000967688 |
| 6             | 2015        | GF1              | PMS1          | 20150115    | GF1_PMS1_E107.9_N21.9_20150115_L1A0000589549 |
| 7             | 2015        | GF1              | PMS1          | 20150119    | GF1_PMS1_E108.4_N21.6_20150119_L1A0000596666 |
| 8             | 2015        | GF1              | PMS1          | 20150119    | GF1_PMS1_E108.4_N21.9_20150119_L1A0000596665 |
| 9             | 2015        | GF1              | PMS1          | 20151217    | GF1_PMS1_E108.8_N21.3_20151217_L1A0001250884 |
| 10            | 2015        | GF1              | PMS1          | 20151217    | GF1_PMS1_E108.8_N21.6_20151217_L1A0001250883 |
| 11            | 2015        | GF1              | PMS1          | 20151217    | GF1_PMS1_E108.9_N21.9_20151217_L1A0001250882 |
| 12            | 2015        | GF1              | PMS1          | 20150419    | GF1_PMS1_E109.4_N21.3_20150419_L1A0000759373 |
| 13            | 2015        | GF1              | PMS1          | 20150530    | GF1_PMS1_E109.4_N21.3_20150530_L1A0000834834 |
| 14            | 2015        | GF1              | PMS1          | 20150419    | GF1_PMS1_E109.5_N21.6_20150419_L1A0000759372 |
| 15            | 2015        | GF1              | PMS1          | 20150530    | GF1_PMS1_E109.5_N21.6_20150530_L1A0000834833 |
| 16            | 2015        | GF1              | PMS1          | 20150415    | GF1_PMS1_E109.5_N21.7_20150415_L1A0000751558 |
| 17            | 2015        | GF1              | PMS1          | 20150415    | GF1_PMS1_E109.5_N21.9_20150415_L1A0000751557 |
| 18            | 2015        | GF1              | PMS1          | 20150419    | GF1_PMS1_E109.6_N21.9_20150419_L1A0000759371 |
| 19            | 2015        | GF1              | PMS1          | 20150530    | GF1_PMS1_E109.6_N21.9_20150530_L1A0000834832 |
| 20            | 2015        | GF1              | PMS1          | 20151102    | GF1_PMS1_E109.6_N21.9_20151102_L1A0001146856 |
| 21            | 2015        | GF1              | PMS1          | 20150824    | GF1_PMS1_E110.1_N21.6_20150824_L1A0000995323 |



|    |          |     |          |              |                                                  |
|----|----------|-----|----------|--------------|--------------------------------------------------|
| 22 | 201<br>5 | GF1 | PMS<br>1 | 201508<br>24 | GF1_PMS1_E110.2_N21.9_20150824_L1A000099<br>5322 |
| 23 | 201<br>5 | GF1 | PMS<br>2 | 201506<br>28 | GF1_PMS2_E108.0_N21.3_20150628_L1A000088<br>8858 |
| 24 | 201<br>5 | GF1 | PMS<br>2 | 201506<br>28 | GF1_PMS2_E108.0_N21.5_20150628_L1A000088<br>8857 |
| 25 | 201<br>5 | GF1 | PMS<br>2 | 201501<br>15 | GF1_PMS2_E108.1_N21.5_20150115_L1A000058<br>9635 |
| 26 | 201<br>5 | GF1 | PMS<br>2 | 201506<br>28 | GF1_PMS2_E108.1_N21.8_20150628_L1A000088<br>8856 |
| 27 | 201<br>5 | GF1 | PMS<br>2 | 201508<br>08 | GF1_PMS2_E108.1_N21.8_20150808_L1A000096<br>7788 |
| 28 | 201<br>5 | GF1 | PMS<br>2 | 201501<br>15 | GF1_PMS2_E108.2_N21.8_20150115_L1A000058<br>9634 |
| 29 | 201<br>5 | GF1 | PMS<br>2 | 201512<br>17 | GF1_PMS2_E109.1_N21.3_20151217_L1A000125<br>0978 |
| 30 | 201<br>5 | GF1 | PMS<br>2 | 201512<br>17 | GF1_PMS2_E109.1_N21.5_20151217_L1A000125<br>0977 |
| 31 | 201<br>5 | GF1 | PMS<br>2 | 201512<br>17 | GF1_PMS2_E109.2_N21.8_20151217_L1A000125<br>0976 |
| 32 | 201<br>5 | GF1 | PMS<br>2 | 201505<br>30 | GF1_PMS2_E109.7_N21.3_20150530_L1A000083<br>4901 |
| 33 | 201<br>5 | GF1 | PMS<br>2 | 201504<br>19 | GF1_PMS2_E109.8_N21.3_20150419_L1A000075<br>9410 |
| 34 | 201<br>5 | GF1 | PMS<br>2 | 201504<br>15 | GF1_PMS2_E109.8_N21.5_20150415_L1A000075<br>1433 |
| 35 | 201<br>5 | GF1 | PMS<br>2 | 201504<br>19 | GF1_PMS2_E109.8_N21.5_20150419_L1A000075<br>9409 |
| 36 | 201<br>5 | GF1 | PMS<br>2 | 201505<br>30 | GF1_PMS2_E109.8_N21.5_20150530_L1A000083<br>4900 |
| 37 | 201<br>5 | GF1 | PMS<br>2 | 201504<br>15 | GF1_PMS2_E109.8_N21.8_20150415_L1A000075<br>1432 |
| 38 | 201<br>5 | GF1 | PMS<br>2 | 201504<br>19 | GF1_PMS2_E109.9_N21.8_20150419_L1A000075<br>9408 |
| 39 | 201<br>5 | GF1 | PMS<br>2 | 201505<br>30 | GF1_PMS2_E109.9_N21.8_20150530_L1A000083<br>4899 |
| 40 | 201<br>5 | GF1 | PMS<br>2 | 201511<br>02 | GF1_PMS2_E110.0_N21.8_20151102_L1A000114<br>6977 |
| 41 | 201<br>5 | GF1 | PMS<br>2 | 201508<br>24 | GF1_PMS2_E110.4_N21.5_20150824_L1A000099<br>5494 |
| 42 | 201<br>5 | GF1 | PMS<br>2 | 201508<br>24 | GF1_PMS2_E110.5_N21.8_20150824_L1A000099<br>5493 |
| 43 | 201<br>5 | ZY3 | MUX      | 201508<br>24 | ZY3_MUX_E109.3_N21.5_20150824_L1A0003202<br>868  |

|    |          |     |          |              |                                                  |
|----|----------|-----|----------|--------------|--------------------------------------------------|
| 44 | 201<br>5 | ZY3 | MUX      | 201508<br>24 | ZY3_MUX_E109.4_N21.9_20150824_L1A0003202<br>867  |
| 45 | 201<br>5 | ZY3 | NAD      | 201508<br>24 | ZY3_NAD_E109.3_N21.5_20150824_L1A0003222<br>317  |
| 46 | 201<br>5 | ZY3 | NAD      | 201508<br>24 | ZY3_NAD_E109.4_N21.9_20150824_L1A0003203<br>100  |
| 47 | 201<br>6 | GF1 | PMS<br>1 | 201602<br>29 | GF1_PMS1_E107.7_N21.6_20160229_L1A000144<br>2714 |
| 48 | 201<br>6 | GF1 | PMS<br>1 | 201602<br>29 | GF1_PMS1_E107.8_N21.9_20160229_L1A000144<br>2717 |
| 49 | 201<br>6 | GF1 | PMS<br>1 | 201604<br>18 | GF1_PMS1_E108.9_N21.6_20160418_L1A000152<br>8864 |
| 50 | 201<br>6 | GF1 | PMS<br>1 | 201604<br>18 | GF1_PMS1_E109.0_N21.9_20160418_L1A000152<br>8858 |
| 51 | 201<br>6 | GF1 | PMS<br>1 | 201606<br>02 | GF1_PMS1_E109.5_N21.3_20160602_L1A000161<br>8645 |
| 52 | 201<br>6 | GF1 | PMS<br>1 | 201606<br>02 | GF1_PMS1_E109.5_N21.6_20160602_L1A000161<br>8647 |
| 53 | 201<br>6 | GF1 | PMS<br>1 | 201606<br>02 | GF1_PMS1_E109.6_N21.9_20160602_L1A000161<br>8643 |
| 54 | 201<br>6 | GF1 | PMS<br>1 | 201606<br>06 | GF1_PMS1_E110.0_N21.3_20160606_L1A000162<br>7449 |
| 55 | 201<br>6 | GF1 | PMS<br>1 | 201606<br>06 | GF1_PMS1_E110.2_N21.9_20160606_L1A000162<br>7455 |
| 56 | 201<br>6 | GF1 | PMS<br>1 | 201610<br>07 | GF1_PMS1_E110.2_N21.9_20161007_L1A000187<br>1601 |
| 57 | 201<br>6 | GF1 | PMS<br>1 | 201602<br>08 | GF1_PMS1_E110.7_N21.5_20160208_L1A000139<br>7816 |
| 58 | 201<br>6 | GF1 | PMS<br>1 | 201602<br>08 | GF1_PMS1_E110.7_N21.6_20160208_L1A000139<br>7815 |
| 59 | 201<br>6 | GF1 | PMS<br>1 | 201612<br>28 | GF1_PMS1_E111.1_N21.6_20161228_L1A000209<br>4274 |
| 60 | 201<br>6 | GF1 | PMS<br>1 | 201612<br>28 | GF1_PMS1_E111.2_N21.9_20161228_L1A000209<br>4280 |
| 61 | 201<br>6 | GF1 | PMS<br>2 | 201602<br>29 | GF1_PMS2_E108.0_N21.5_20160229_L1A000144<br>1726 |
| 62 | 201<br>6 | GF1 | PMS<br>2 | 201602<br>29 | GF1_PMS2_E108.1_N21.8_20160229_L1A000144<br>1728 |
| 63 | 201<br>6 | GF1 | PMS<br>2 | 201604<br>18 | GF1_PMS2_E109.2_N21.3_20160418_L1A000152<br>8973 |
| 64 | 201<br>6 | GF1 | PMS<br>2 | 201604<br>18 | GF1_PMS2_E109.2_N21.5_20160418_L1A000152<br>8977 |
| 65 | 201<br>6 | GF1 | PMS<br>2 | 201604<br>18 | GF1_PMS2_E109.3_N21.8_20160418_L1A000152<br>8976 |

|    |          |     |          |              |                                                  |
|----|----------|-----|----------|--------------|--------------------------------------------------|
| 66 | 201<br>6 | GF1 | PMS<br>2 | 201606<br>02 | GF1_PMS2_E109.8_N21.5_20160602_L1A000161<br>8765 |
| 67 | 201<br>6 | GF1 | PMS<br>2 | 201606<br>02 | GF1_PMS2_E109.9_N21.8_20160602_L1A000161<br>8763 |
| 68 | 201<br>6 | GF1 | PMS<br>2 | 201606<br>06 | GF1_PMS2_E110.5_N21.8_20160606_L1A000162<br>7527 |
| 69 | 201<br>6 | GF1 | PMS<br>2 | 201610<br>07 | GF1_PMS2_E110.5_N21.8_20161007_L1A000187<br>1620 |
| 70 | 201<br>6 | GF1 | PMS<br>2 | 201612<br>28 | GF1_PMS2_E111.5_N21.5_20161228_L1A000209<br>4331 |
| 71 | 201<br>6 | GF1 | PMS<br>2 | 201612<br>28 | GF1_PMS2_E111.5_N21.8_20161228_L1A000209<br>4334 |
| 72 | 201<br>6 | GF2 | PMS<br>1 | 201609<br>21 | GF2_PMS1_E108.2_N21.7_20160921_L1A000184<br>4006 |
| 73 | 201<br>6 | GF2 | PMS<br>1 | 201609<br>21 | GF2_PMS1_E108.2_N21.9_20160921_L1A000184<br>3993 |
| 74 | 201<br>6 | GF2 | PMS<br>2 | 201609<br>21 | GF2_PMS2_E108.3_N21.5_20160921_L1A000184<br>3863 |
| 75 | 201<br>6 | GF2 | PMS<br>2 | 201609<br>21 | GF2_PMS2_E108.4_N21.7_20160921_L1A000184<br>3861 |
| 76 | 201<br>6 | GF2 | PMS<br>2 | 201609<br>21 | GF2_PMS2_E108.4_N21.9_20160921_L1A000184<br>3859 |
| 77 | 201<br>7 | GF1 | PMS<br>1 | 201710<br>23 | GF1_PMS1_E109.8_N21.6_20171023_L1A000327<br>1847 |
| 78 | 201<br>7 | GF1 | PMS<br>1 | 201708<br>31 | GF1_PMS1_E109.8_N21.9_20170831_L1A000257<br>4251 |
| 79 | 201<br>7 | GF1 | PMS<br>1 | 201712<br>24 | GF1_PMS1_E109.8_N21.9_20171224_L1A000287<br>4921 |
| 80 | 201<br>7 | GF1 | PMS<br>1 | 201710<br>23 | GF1_PMS1_E109.9_N21.9_20171023_L1A000270<br>0936 |
| 81 | 201<br>7 | GF1 | PMS<br>1 | 201704<br>01 | GF1_PMS1_E110.5_N21.9_20170401_L1A000227<br>8914 |
| 82 | 201<br>7 | GF1 | PMS<br>2 | 201701<br>26 | GF1_PMS2_E108.7_N21.8_20170126_L1A000326<br>9791 |
| 83 | 201<br>7 | GF1 | PMS<br>2 | 201712<br>24 | GF1_PMS2_E110.0_N21.5_20171224_L1A000287<br>5138 |
| 84 | 201<br>7 | GF1 | PMS<br>2 | 201708<br>31 | GF1_PMS2_E110.1_N21.8_20170831_L1A000257<br>4326 |
| 85 | 201<br>7 | GF1 | PMS<br>2 | 201712<br>24 | GF1_PMS2_E110.1_N21.8_20171224_L1A000287<br>5136 |
| 86 | 201<br>7 | GF1 | PMS<br>2 | 201710<br>23 | GF1_PMS2_E110.3_N21.8_20171023_L1A000270<br>1141 |
| 87 | 201<br>7 | GF2 | PMS<br>1 | 201712<br>19 | GF2_PMS1_E108.5_N21.5_20171219_L1A000286<br>1833 |

|     |          |     |          |              |                                                  |
|-----|----------|-----|----------|--------------|--------------------------------------------------|
| 88  | 201<br>7 | GF2 | PMS<br>1 | 201712<br>19 | GF2_PMS1_E108.5_N21.7_20171219_L1A000286<br>1829 |
| 89  | 201<br>7 | GF2 | PMS<br>1 | 201712<br>19 | GF2_PMS1_E108.6_N21.9_20171219_L1A000286<br>1847 |
| 90  | 201<br>7 | GF2 | PMS<br>1 | 201704<br>01 | GF2_PMS1_E110.2_N21.9_20170401_L1A000227<br>7714 |
| 91  | 201<br>7 | GF2 | PMS<br>2 | 201712<br>19 | GF2_PMS2_E108.7_N21.5_20171219_L1A000286<br>2166 |
| 92  | 201<br>7 | GF2 | PMS<br>2 | 201712<br>19 | GF2_PMS2_E108.7_N21.7_20171219_L1A000286<br>2163 |
| 93  | 201<br>7 | GF2 | PMS<br>2 | 201712<br>19 | GF2_PMS2_E108.8_N21.9_20171219_L1A000286<br>2161 |
| 94  | 201<br>7 | GF2 | PMS<br>2 | 201704<br>01 | GF2_PMS2_E110.4_N21.9_20170401_L1A000227<br>7595 |
| 95  | 201<br>8 | GF1 | PMS<br>1 | 201802<br>03 | GF1_PMS1_E109.1_N21.3_20180203_L1A000297<br>8099 |
| 96  | 201<br>8 | GF1 | PMS<br>1 | 201802<br>03 | GF1_PMS1_E109.2_N21.6_20180203_L1A000297<br>8095 |
| 97  | 201<br>8 | GF1 | PMS<br>2 | 201810<br>07 | GF1_PMS2_E108.4_N21.8_20181007_L1A000350<br>4939 |
| 98  | 201<br>8 | GF1 | PMS<br>2 | 201802<br>03 | GF1_PMS2_E109.5_N21.5_20180203_L1A000297<br>8029 |
| 99  | 201<br>8 | GF2 | PMS<br>1 | 201808<br>22 | GF2_PMS1_E108.0_N21.5_20180822_L2A000379<br>1677 |
| 100 | 201<br>8 | GF2 | PMS<br>1 | 201804<br>01 | GF2_PMS1_E108.1_N21.5_20180401_L2A000347<br>9084 |
| 101 | 201<br>8 | GF2 | PMS<br>1 | 201809<br>06 | GF2_PMS1_E108.2_N21.5_20180906_L1A000343<br>6752 |
| 102 | 201<br>8 | GF2 | PMS<br>1 | 201802<br>01 | GF2_PMS1_E109.1_N21.0_20180201_L1A000297<br>3830 |
| 103 | 201<br>8 | GF2 | PMS<br>1 | 201802<br>01 | GF2_PMS1_E109.1_N21.2_20180201_L1A000297<br>3824 |
| 104 | 201<br>8 | GF2 | PMS<br>1 | 201802<br>01 | GF2_PMS1_E109.1_N21.4_20180201_L1A000297<br>3823 |
| 105 | 201<br>8 | GF2 | PMS<br>1 | 201802<br>01 | GF2_PMS1_E109.2_N21.5_20180201_L1A000297<br>3825 |
| 106 | 201<br>8 | GF2 | PMS<br>1 | 201802<br>01 | GF2_PMS1_E109.2_N21.7_20180201_L1A000297<br>3826 |
| 107 | 201<br>8 | GF2 | PMS<br>1 | 201802<br>01 | GF2_PMS1_E109.3_N21.9_20180201_L1A000297<br>3821 |
| 108 | 201<br>8 | GF2 | PMS<br>2 | 201804<br>01 | GF2_PMS2_E108.3_N21.5_20180401_L1A000309<br>6670 |
| 109 | 201<br>8 | GF2 | PMS<br>2 | 201807<br>04 | GF2_PMS2_E108.4_N21.5_20180704_L1A000330<br>1155 |

|     |          |       |          |              |                                                   |
|-----|----------|-------|----------|--------------|---------------------------------------------------|
| 110 | 201<br>8 | GF2   | PMS<br>2 | 201802<br>01 | GF2_PMS2_E109.4_N21.5_20180201_L1A000297<br>3910  |
| 111 | 201<br>8 | GF2   | PMS<br>2 | 201802<br>01 | GF2_PMS2_E109.4_N21.7_20180201_L1A000297<br>3905  |
| 112 | 201<br>8 | GF2   | PMS<br>2 | 201802<br>01 | GF2_PMS2_E109.5_N21.9_20180201_L1A000297<br>3909  |
| 113 | 201<br>8 | ZY302 | TMS      | 201812<br>18 | ZY302_TMS_E108.8_N21.5_20181218_L1A00008<br>48155 |
| 114 | 201<br>8 | ZY302 | TMS      | 201812<br>18 | ZY302_TMS_E108.9_N21.9_20181218_L1A00008<br>56698 |
| 115 | 201<br>9 | GF1   | PMS<br>1 | 201911<br>21 | GF1_PMS1_E109.8_N21.6_20191121_L1A000440<br>8904  |
| 116 | 201<br>9 | GF1   | PMS<br>1 | 201911<br>21 | GF1_PMS1_E109.5_N21.9_20201128_L1A000526<br>0869  |
| 117 | 201<br>9 | GF1   | PMS<br>1 | 201911<br>21 | GF1_PMS1_E109.9_N21.9_20191121_L1A000440<br>8903  |
| 118 | 201<br>9 | GF2   | PMS<br>1 | 201912<br>03 | GF2_PMS1_E108.8_N21.5_20191203_L1A000444<br>5382  |
| 119 | 201<br>9 | GF2   | PMS<br>1 | 201912<br>03 | GF2_PMS1_E108.8_N21.7_20191203_L1A000444<br>5381  |
| 120 | 201<br>9 | GF2   | PMS<br>1 | 201912<br>03 | GF2_PMS1_E108.9_N21.9_20191203_L1A000444<br>5384  |
| 121 | 201<br>9 | GF2   | PMS<br>1 | 201910<br>05 | GF2_PMS1_E109.2_N21.4_20191005_L1A000429<br>3228  |
| 122 | 201<br>9 | GF2   | PMS<br>1 | 201909<br>25 | GF2_PMS1_E109.6_N21.5_20190925_L1A000426<br>7353  |
| 123 | 201<br>9 | GF2   | PMS<br>1 | 201909<br>25 | GF2_PMS1_E109.6_N21.7_20190925_L1A000426<br>7352  |
| 124 | 201<br>9 | GF2   | PMS<br>1 | 201903<br>12 | GF2_PMS1_E109.7_N21.4_20190312_L1A000387<br>9242  |
| 125 | 201<br>9 | GF2   | PMS<br>1 | 201903<br>12 | GF2_PMS1_E109.7_N21.5_20190312_L1A000387<br>9241  |
| 126 | 201<br>9 | GF2   | PMS<br>2 | 201911<br>28 | GF2_PMS2_E109.0_N21.5_20191128_L1A000442<br>7330  |
| 127 | 201<br>9 | GF2   | PMS<br>2 | 201912<br>03 | GF2_PMS2_E109.0_N21.5_20191203_L1A000444<br>5589  |
| 128 | 201<br>9 | GF2   | PMS<br>2 | 201912<br>03 | GF2_PMS2_E109.0_N21.7_20191203_L1A000444<br>5588  |
| 129 | 201<br>9 | GF2   | PMS<br>2 | 201911<br>28 | GF2_PMS2_E109.1_N21.7_20191128_L1A000442<br>7329  |
| 130 | 201<br>9 | GF2   | PMS<br>2 | 201910<br>05 | GF2_PMS2_E109.4_N21.5_20191005_L1A000429<br>3321  |
| 131 | 201<br>9 | GF2   | PMS<br>2 | 201910<br>05 | GF2_PMS2_E109.5_N21.7_20191005_L1A000429<br>3318  |

|     |          |       |          |              |                                                   |
|-----|----------|-------|----------|--------------|---------------------------------------------------|
| 132 | 201<br>9 | GF2   | PMS<br>2 | 201909<br>20 | GF2_PMS2_E109.7_N21.7_20190920_L1A000425<br>6398  |
| 133 | 201<br>9 | GF2   | PMS<br>2 | 201909<br>25 | GF2_PMS2_E109.8_N21.5_20190925_L1A000426<br>6799  |
| 134 | 201<br>9 | GF2   | PMS<br>2 | 201903<br>12 | GF2_PMS2_E109.9_N21.4_20190312_L1A000387<br>9381  |
| 135 | 201<br>9 | GF2   | PMS<br>2 | 201903<br>12 | GF2_PMS2_E109.9_N21.5_20190312_L1A000387<br>9380  |
| 136 | 201<br>9 | ZY302 | TMS      | 201912<br>02 | ZY302_TMS_E108.1_N21.5_20191202_L1A00008<br>72768 |
| 137 | 201<br>9 | ZY302 | TMS      | 201904<br>10 | ZY302_TMS_E108.2_N21.5_20190410_L1A00008<br>74614 |
| 138 | 202<br>0 | GF1   | PMS<br>1 | 202011<br>28 | GF1_PMS1_E109.5_N21.9_20201128_L1A000526<br>0869  |
| 139 | 202<br>0 | GF1   | PMS<br>1 | 202010<br>22 | GF1_PMS1_E108.0_N21.6_20201022_L1A000515<br>8774  |
| 140 | 202<br>0 | GF1   | PMS<br>1 | 202011<br>28 | GF1_PMS1_E109.5_N21.6_20201128_L1A000526<br>0870  |
| 141 | 202<br>0 | GF1   | PMS<br>2 | 202010<br>22 | GF1_PMS2_E108.4_N21.8_20201022_L1A000515<br>8617  |
| 142 | 202<br>0 | GF1   | PMS<br>2 | 202011<br>24 | GF1_PMS2_E109.2_N21.5_20201124_L1A000524<br>5863  |
| 143 | 202<br>0 | GF1   | PMS<br>2 | 202011<br>28 | GF1_PMS2_E109.8_N21.5_20201128_L1A000526<br>1248  |
| 144 | 202<br>0 | GF2   | PMS<br>1 | 202009<br>04 | GF2_PMS1_E108.0_N21.5_20200904_L1A000503<br>7186  |
| 145 | 202<br>0 | GF2   | PMS<br>1 | 202009<br>24 | GF2_PMS1_E108.3_N21.5_20200924_L1A000508<br>3812  |
| 146 | 202<br>0 | GF2   | PMS<br>1 | 202009<br>24 | GF2_PMS1_E108.3_N21.7_20200924_L1A000508<br>3809  |
| 147 | 202<br>0 | GF2   | PMS<br>1 | 202012<br>07 | GF2_PMS1_E108.9_N21.7_20201207_L1A000529<br>1888  |
| 148 | 202<br>0 | GF2   | PMS<br>1 | 202011<br>07 | GF2_PMS1_E109.7_N21.5_20201107_L1A000517<br>0121  |
| 149 | 202<br>0 | GF2   | PMS<br>2 | 202011<br>27 | GF2_PMS2_E108.1_N21.5_20201127_L1A000525<br>9987  |
| 150 | 202<br>0 | GF2   | PMS<br>2 | 202011<br>27 | GF2_PMS2_E108.1_N21.7_20201127_L1A000525<br>9986  |
| 151 | 202<br>0 | GF2   | PMS<br>2 | 202009<br>04 | GF2_PMS2_E108.2_N21.5_20200904_L1A000503<br>7354  |
| 152 | 202<br>0 | GF2   | PMS<br>2 | 202009<br>04 | GF2_PMS2_E108.2_N21.7_20200904_L1A000503<br>7355  |
| 153 | 202<br>0 | GF2   | PMS<br>2 | 202009<br>24 | GF2_PMS2_E108.5_N21.5_20200924_L1A000508<br>3607  |



|     |      |       |      |          |                                               |
|-----|------|-------|------|----------|-----------------------------------------------|
| 154 | 2020 | GF2   | PMS2 | 20200924 | GF2_PMS2_E108.6_N21.7_20200924_L1A0005083603  |
| 155 | 2020 | GF2   | PMS2 | 20200924 | GF2_PMS2_E108.6_N21.9_20200924_L1A0005083219  |
| 156 | 2020 | GF2   | PMS2 | 20201207 | GF2_PMS2_E109.1_N21.5_20201207_L1A0005292057  |
| 157 | 2020 | GF2   | PMS2 | 20201207 | GF2_PMS2_E109.2_N21.7_20201207_L1A0005292056  |
| 158 | 2020 | GF2   | PMS2 | 20201107 | GF2_PMS2_E109.9_N21.5_20201107_L1A0005170248  |
| 159 | 2020 | GF6   | PMS  | 20200901 | GF6_PMS_E108.7_N21.7_20200901_L1A1120031893   |
| 160 | 2020 | ZY302 | TMS  | 20200130 | ZY302_TMS_E108.3_N21.5_20200130_L1A0000856738 |
| 161 | 2020 | ZY302 | TMS  | 20200130 | ZY302_TMS_E108.4_N21.9_20200130_L1A0000848153 |
| 162 | 2020 | ZY302 | TMS  | 20201130 | ZY302_TMS_E109.0_N21.9_20201130_L1A0000855203 |
| 163 | 2021 | GF1   | PMS1 | 20211128 | GF1_PMS1_E108.9_N21.6_20211128_L1A0006087305  |
| 164 | 2021 | GF1   | PMS1 | 20211128 | GF1_PMS1_E109.0_N22.2_20211128_L1A0006087303  |
| 165 | 2021 | GF1   | PMS1 | 20211202 | GF1_PMS1_E109.4_N21.3_20211202_L1A0006101803  |
| 166 | 2021 | GF1   | PMS1 | 20211202 | GF1_PMS1_E109.5_N21.6_20211202_L1A0006101804  |
| 167 | 2021 | GF1   | PMS1 | 20211202 | GF1_PMS1_E109.5_N21.9_20211202_L1A0006101802  |
| 168 | 2021 | GF1   | PMS1 | 20211202 | GF1_PMS1_E109.6_N22.2_20211202_L1A0006101801  |
| 169 | 2021 | GF1   | PMS1 | 20211206 | GF1_PMS1_E110.0_N21.6_20211206_L1A0006113474  |
| 170 | 2021 | GF1   | PMS1 | 20211206 | GF1_PMS1_E110.1_N21.9_20211206_L1A0006113472  |
| 171 | 2021 | GF1   | PMS2 | 20211202 | GF1_PMS2_E109.8_N21.5_20211202_L1A0006101062  |
| 172 | 2021 | GF1   | PMS2 | 20211202 | GF1_PMS2_E109.8_N21.8_20211202_L1A0006101061  |
| 173 | 2021 | GF1   | PMS2 | 20211202 | GF1_PMS2_E109.9_N22.1_20211202_L1A0006101060  |
| 174 | 2021 | GF2   | PMS1 | 20210214 | GF2_PMS1_E108.4_N21.5_20210214_L1A0005477261  |
| 175 | 2021 | GF2   | PMS1 | 20210214 | GF2_PMS1_E108.5_N21.7_20210214_L1A0005477262  |

|     |          |       |          |              |                                                   |
|-----|----------|-------|----------|--------------|---------------------------------------------------|
| 176 | 202<br>1 | GF2   | PMS<br>1 | 202102<br>14 | GF2_PMS1_E108.5_N21.9_20210214_L1A000547<br>7259  |
| 177 | 202<br>1 | GF2   | PMS<br>1 | 202111<br>12 | GF2_PMS1_E109.1_N21.5_20211112_L1A000603<br>4896  |
| 178 | 202<br>1 | GF2   | PMS<br>1 | 202112<br>11 | GF2_PMS1_E109.2_N21.4_20211211_L1A000612<br>7567  |
| 179 | 202<br>1 | GF2   | PMS<br>1 | 202112<br>11 | GF2_PMS1_E109.2_N21.5_20211211_L1A000612<br>7565  |
| 180 | 202<br>1 | GF2   | PMS<br>1 | 202112<br>11 | GF2_PMS1_E109.3_N21.7_20211211_L1A000612<br>7559  |
| 181 | 202<br>1 | GF2   | PMS<br>1 | 202112<br>11 | GF2_PMS1_E109.3_N21.9_20211211_L1A000612<br>7555  |
| 182 | 202<br>1 | GF2   | PMS<br>1 | 202112<br>11 | GF2_PMS1_E109.3_N22.0_20211211_L1A000612<br>7548  |
| 183 | 202<br>1 | GF2   | PMS<br>2 | 202102<br>14 | GF2_PMS2_E108.7_N21.5_20210214_L1A000547<br>7177  |
| 184 | 202<br>1 | GF2   | PMS<br>2 | 202102<br>14 | GF2_PMS2_E108.7_N21.7_20210214_L1A000547<br>7175  |
| 185 | 202<br>1 | GF2   | PMS<br>2 | 202102<br>14 | GF2_PMS2_E108.7_N21.9_20210214_L1A000547<br>7176  |
| 186 | 202<br>1 | GF2   | PMS<br>2 | 202102<br>14 | GF2_PMS2_E108.8_N22.0_20210214_L1A000547<br>7173  |
| 187 | 202<br>1 | GF2   | PMS<br>2 | 202111<br>12 | GF2_PMS2_E109.2_N21.3_20211112_L1A000603<br>4533  |
| 188 | 202<br>1 | GF2   | PMS<br>2 | 202111<br>12 | GF2_PMS2_E109.3_N21.5_20211112_L1A000603<br>4532  |
| 189 | 202<br>1 | GF2   | PMS<br>2 | 202112<br>11 | GF2_PMS2_E109.4_N21.5_20211211_L1A000612<br>7584  |
| 190 | 202<br>1 | GF2   | PMS<br>2 | 202112<br>11 | GF2_PMS2_E109.5_N21.7_20211211_L1A000612<br>7582  |
| 191 | 202<br>1 | GF2   | PMS<br>2 | 202112<br>11 | GF2_PMS2_E109.5_N21.9_20211211_L1A000612<br>7576  |
| 192 | 202<br>1 | GF2   | PMS<br>2 | 202112<br>11 | GF2_PMS2_E109.6_N22.0_20211211_L1A000612<br>7597  |
| 193 | 202<br>1 | ZY302 | TMS      | 202110<br>25 | ZY302_TMS_E107.6_N21.9_20211025_L1A00009<br>09458 |
| 194 | 202<br>1 | ZY302 | TMS      | 202110<br>25 | ZY302_TMS_E107.7_N22.3_20211025_L1A00009<br>09452 |
| 195 | 202<br>1 | ZY302 | TMS      | 202101<br>13 | ZY302_TMS_E107.8_N21.5_20210113_L1A00008<br>72046 |
| 196 | 202<br>1 | ZY302 | TMS      | 202101<br>13 | ZY302_TMS_E107.8_N21.5_20210113_L1A00009<br>29194 |
| 197 | 202<br>1 | ZY302 | TMS      | 202103<br>13 | ZY302_TMS_E108.0_N21.9_20210313_L1A00008<br>10766 |

|     |          |       |     |              |                                                          |
|-----|----------|-------|-----|--------------|----------------------------------------------------------|
| 198 | 202<br>1 | ZY302 | TMS | 202101<br>18 | ZY302_TMS_E108.1_N21.5_20210118_L1A00007<br>85809        |
| 199 | 202<br>1 | ZY302 | TMS | 202101<br>18 | ZY302_TMS_E108.2_N21.9_20210118_L1A00007<br>85745        |
| 200 | 202<br>1 | ZY302 | TMS | 202101<br>23 | ZY302_TMS_E108.5_N21.5_20210123_L1A00007<br>87692        |
| 201 | 202<br>1 | ZY302 | TMS | 202111<br>09 | ZY302_TMS_E108.6_N21.5_20211109_L1A00009<br>14646        |
| 202 | 202<br>1 | ZY302 | TMS | 202101<br>23 | ZY302_TMS_E108.6_N21.9_20210123_L1A00007<br>87708        |
| 203 | 202<br>1 | ZY302 | TMS | 202111<br>14 | ZY302_TMS_E109.0_N21.1_20211114_L1A00009<br>16468        |
| 204 | 202<br>1 | ZY302 | TMS | 202109<br>11 | ZY302_TMS_E109.1_N21.5_20210911_L1A00008<br>90639        |
| 205 | 202<br>1 | ZY302 | TMS | 202111<br>14 | ZY302_TMS_E109.1_N21.5_20211114_L1A00009<br>16466        |
| 206 | 202<br>1 | ZY302 | TMS | 202111<br>14 | ZY302_TMS_E109.1_N21.9_20211114_L1A00009<br>16514        |
| 207 | 202<br>1 | ZY302 | TMS | 202109<br>11 | ZY302_TMS_E109.2_N21.9_20210911_L1A00008<br>90632        |
| 208 | 202<br>1 | ZY302 | TMS | 202107<br>24 | ZY302_TMS_E109.3_N21.5_20210724_L1A00008<br>69367        |
| 209 | 202<br>1 | ZY302 | TMS | 202107<br>24 | ZY302_TMS_E109.4_N21.9_20210724_L1A00008<br>69375        |
| 210 | 202<br>1 | ZY302 | TMS | 202102<br>07 | ZY302_TMS_E109.7_N21.9_20210207_L1A00007<br>95356        |
| 211 | 202<br>1 | ZY302 | TMS | 202111<br>24 | ZY302_TMS_E109.9_N21.1_20211124_L1A00009<br>20650        |
| 212 | 202<br>1 | ZY302 | TMS | 202102<br>12 | ZY302_TMS_E110.0_N21.1_20210212_L1A00007<br>97553        |
| 213 | 202<br>1 | ZY302 | TMS | 202111<br>24 | ZY302_TMS_E110.0_N21.5_20211124_L1A00009<br>20651        |
| 214 | 202<br>1 | ZY302 | TMS | 202111<br>24 | ZY302_TMS_E110.0_N21.9_20211124_L1A00009<br>20679        |
| 215 | 202<br>1 | ZY302 | TMS | 202102<br>12 | ZY302_TMS_E110.1_N21.5_20210212_L1A00007<br>97535        |
| 216 | 202<br>1 | ZY302 | TMS | 202110<br>01 | ZY302_TMS_E110.2_N21.5_20211001_L1A00009<br>00335        |
| 217 | 202<br>1 | ZY302 | TMS | 202102<br>12 | ZY302_TMS_E110.2_N21.9_20210212_L1A00007<br>97586        |
| 218 | 202<br>0 | ZY302 | TMS | 202001<br>07 | RH_ZY302_TMS_E108.5_N21.5_20220107_L1A0<br>000939942.dat |
| 219 | 201<br>9 | GF6   | PMS | 201911<br>11 | GF6_PMS_E107.7_N21.8_20191111_L1A1119942<br>375          |

|     |      |     |     |          |                                             |
|-----|------|-----|-----|----------|---------------------------------------------|
| 220 | 2019 | GF6 | PMS | 20191123 | GF6_PMS_E109.4_N21.2_20191123_L1A1119945566 |
| 221 | 2019 | GF6 | PMS | 20191123 | GF6_PMS_E109.5_N21.7_20191123_L1A1119945593 |
| 222 | 2020 | GF6 | PMS | 20200901 | GF6_PMS_E108.7_N21.7_20200901_L1A1120031893 |
| 223 | 2021 | GF6 | PMS | 20211012 | GF6_PMS_E108.2_N21.7_20211012_L1A1120149260 |
| 224 | 2021 | GF6 | PMS | 20211126 | GF6_PMS_E108.8_N21.7_20211126_L1A1120161114 |
| 225 | 2021 | GF6 | PMS | 20211130 | GF6_PMS_E109.4_N21.7_20211130_L1A1120162354 |
| 226 | 2021 | GF6 | PMS | 20211204 | GF6_PMS_E110.0_N21.7_20211204_L1A1120163327 |
